# Supplementary material for: Material Damage to Multielectrode Arrays after Electrolytic Lesioning is in the Noise
Source: eLife journal article supplement (doi:10.7554/elife.106452), 2025-06-09
Supplement: supp1 [file elife-106452-supp1-v1.pdf]

**Supplemental Table 1:**

Details and characteristics for all imaged and analyzed devices in this work.

| Subject | Region              | Metal | DOB         | Implant Date | Explant Date | Days | Serial Num  | Size | Notes                                                                                                                                                  |
|---------|---------------------|-------|-------------|--------------|--------------|------|-------------|------|--------------------------------------------------------------------------------------------------------------------------------------------------------|
| H       | PMd                 | Pt    | Dec 14 2006 | Mar 17 2014  | 6 May 2020   | 2242 | 1024-1177   | 96   | Missing wire bundle – layout/numbering is arbitrary                                                                                                    |
| H       | M1                  | Pt    | Dec 14 2006 | Mar 17 2014  | 6 May 2020   | 2242 | 1024-1166   | 96   |                                                                                                                                                        |
| F       | PMd                 | Pt    | 2003        | Sep 8 2014   | 27 Oct 2019  | 1875 | 1024-1171   | 96   |                                                                                                                                                        |
| F       | M1                  | Pt    | 2003        | Sep 8 2014   | 27 Oct 2019  | 1875 | 1024-1175   | 96   | Missing wire bundle; previously encapsulated in fibrin                                                                                                 |
| U       | PMd                 | IrOx  | Mar 22 2010 | Aug 4 2017   | Dec 5 2024   | 2680 | 1024-1903   | 96   |                                                                                                                                                        |
| U       | M1 medial posterior | IrOx  | Mar 22 2010 | Aug 4 2017   | Dec 5 2024   | 2680 | 1024-1902   | 96   | Broken during extraction                                                                                                                               |
| U       | M1 lateral anterior | IrOx  | Mar 22 2010 | Aug 4 2017   | Dec 5 2024   | 2680 | 1024-1905   | 96   |                                                                                                                                                        |
| C       | PMd                 | IrOx  | May 15 2007 | Mar 25 2021  | 9 Nov 2022   | 594  | 6250-001604 | 96   |                                                                                                                                                        |
| C       | M1                  | IrOx  | May 15 2007 | Mar 25 2021  | 9 Nov 2022   | 594  | 6250-001608 | 96   |                                                                                                                                                        |
| Agar    |                     |       |             | 25 Aug 2022  | 25 Aug 2022  |      | 1025-149    | 64   | Implanted briefly into agar gel and used to test initial electrolytic lesioning protocols during development.                                          |
| P       |                     | Pt    |             |              |              |      | 1024-0577   | 96   | Used in multiple lesions associated with Bray*, Clarke*, et al., eLife 2024. Implanted and removed from brain tissue multiple times over weeks/months. |
| Control |                     |       |             |              |              |      |             | 96   | Never-implanted array. Damage and debris are due to handling. One image is available per column.                                                       |
