# Supplementary material for: Material Damage to Multielectrode Arrays after Electrolytic Lesioning is in the Noise
Source: eLife journal article supplement (doi:10.7554/elife.106452), 2025-06-09
Supplement: supp5 [file elife-106452-supp5-v1.pdf]

**Supplemental Table 5:**

Bonferroni-corrected p-value is 0.005 (0.05/n=10 comparisons).

| Damage Types | All     |         | R1      |         | R2      |         | R3      |         | R4      |         | R5      |         |
|--------------|---------|---------|---------|---------|---------|---------|---------|---------|---------|---------|---------|---------|
|              | r       | p-val   | r       | p-val   | r       | p-val   | r       | p-val   | r       | p-val   | r       | p-val   |
| AD/AD        | 1.0000  | < 0.001 | 1.0000  | < 0.001 | 1.0000  | < 0.001 | 1.0000  | < 0.001 | 1.0000  | < 0.001 | 1.0000  | < 0.001 |
| AD/TB        | 0.1226  | < 0.05  | -0.0292 | 0.9178  | 0.1591  | 0.3141  | 0.1387  | 0.2521  | 0.1375  | 0.1704  | 0.0792  | 0.4268  |
| AD/CC        | -0.0443 | 0.4215  | -0.1274 | 0.6509  | 0.0937  | 0.5549  | 0.0778  | 0.5221  | -0.0619 | 0.5383  | -0.2294 | 0.0198  |
| AD/PC        | -0.1621 | < 0.005 | -0.0714 | 0.8003  | -0.2846 | 0.0677  | -0.3252 | < 0.01  | -0.1970 | < 0.05  | -0.0499 | 0.6163  |
| AD/PD        | 0.0437  | 0.4278  | 0.2857  | 0.3019  | -0.0577 | 0.7168  | -0.0018 | 0.9882  | -0.0064 | 0.9492  | 0.0775  | 0.4366  |
| TB/TB        | 1.0000  | < 0.001 | 1.0000  | < 0.001 | 1.0000  | < 0.001 | 1.0000  | < 0.001 | 1.0000  | < 0.001 | 1.0000  | < 0.001 |
| TB/CC        | 0.4676  | < 0.001 | 0.7802  | < 0.001 | 0.6069  | < 0.001 | 0.5575  | < 0.001 | 0.4405  | < 0.001 | 0.3100  | < 0.005 |
| TB/PC        | -0.1527 | < 0.01  | -0.1750 | 0.5328  | 0.2901  | 0.0624  | -0.2391 | < 0.05  | -0.2535 | < 0.05  | -0.2411 | < 0.05  |
| TB/PD        | -0.1449 | < 0.01  | -0.1750 | 0.5328  | -0.1614 | 0.3071  | -0.0674 | 0.5792  | -0.2227 | < 0.05  | -0.1925 | 0.0514  |
| CC/CC        | 1.0000  | < 0.001 | 1.0000  | < 0.001 | 1.0000  | < 0.001 | 1.0000  | < 0.001 | 1.0000  | < 0.001 | 1.0000  | < 0.001 |
| CC/PC        | -0.1366 | < 0.05  | -0.2548 | 0.3594  | 0.0677  | 0.6701  | -0.3252 | < 0.01  | -0.3775 | < 0.001 | -0.1396 | 0.1595  |
| CC/PD        | 0.1203  | < 0.05  | 0.1274  | 0.6509  | -0.1658 | 0.2940  | -0.0188 | 0.8775  | -0.1760 | 0.0783  | 0.2562  | < 0.01  |
| PC/PC        | 1.0000  | < 0.001 | 1.0000  | < 0.001 | 1.0000  | < 0.001 | 1.0000  | < 0.001 | 1.0000  | < 0.001 | 1.0000  | < 0.001 |
| PC/PD        | 0.2889  | < 0.001 | -0.0714 | 0.8003  | 0.1332  | 0.4003  | 0.1979  | 0.1005  | 0.4326  | < 0.001 | 0.2292  | < 0.05  |
| PD/PD        | 1.0000  | < 0.001 | 1.0000  | < 0.001 | 1.0000  | < 0.001 | 1.0000  | < 0.001 | 1.0000  | < 0.001 | 1.0000  | < 0.001 |
