# Supplementary material for: Material Damage to Multielectrode Arrays after Electrolytic Lesioning is in the Noise
Source: eLife journal article supplement (doi:10.7554/elife.106452), 2025-06-09
Supplement: video1-data2 [file elife-106452-video1-data2-v1.pdf]

|    |
|----|
| R1 |
| R2 |
| R3 |
| R4 |
| R5 |

|    |    |    |    |    |    |    |    |    |   |
|----|----|----|----|----|----|----|----|----|---|
|    | 79 | 69 | 59 | 49 | 39 | 29 | 19 | 9  |   |
| 89 | 80 | 70 | 60 | 50 | 40 | 30 | 20 | 10 | 1 |
| 90 | 81 | 71 | 61 | 51 | 41 | 31 | 21 | 11 | 2 |
| 91 | 82 | 72 | 62 | 52 | 42 | 32 | 22 | 12 | 3 |
| 92 | 83 | 73 | 63 | 53 | 43 | 33 | 23 | 13 | 4 |
| 93 | 84 | 74 | 64 | 54 | 44 | 34 | 24 | 14 | 5 |
| 94 | 85 | 75 | 65 | 55 | 45 | 35 | 25 | 15 | 6 |
| 95 | 86 | 76 | 66 | 56 | 46 | 36 | 26 | 16 | 7 |
| 96 | 87 | 77 | 67 | 57 | 47 | 37 | 27 | 17 | 8 |
|    | 88 | 78 | 68 | 58 | 48 | 38 | 28 | 18 |   |

Wire Bundle
